# Supplementary material for: The Clebsch–Gordan Coefficients and Their Application to Magnetic Resonance
Source: Hindawi journal article supplement (doi:10.1155/2022/1143341), 2022-05-17
Supplement: f1 [file 1143341.f1.pdf]

**Supplementary Material for “The Clebsch-Gordan Coefficients and Their Application to Magnetic Resonance”**

The effect of the lowering operators on spins 1/2-4 are shown in the sections below.

**Section S1. SPIN (RANK) 1/2**

| $j$           | $m$            | $j(j+1)$      | $m(m-1)$       | $j(j+1) - m(m-1)$ | $\sqrt{j(j+1) - m(m-1)}$ |
|---------------|----------------|---------------|----------------|-------------------|--------------------------|
| $\frac{1}{2}$ | $\frac{1}{2}$  | $\frac{3}{4}$ | $-\frac{1}{4}$ | 1                 | 1                        |
| $\frac{1}{2}$ | $-\frac{1}{2}$ | $\frac{3}{4}$ | $\frac{3}{4}$  | 0                 | 0                        |

**Section S2. SPIN (RANK) 1**

| $j$ | $m$ | $j(j+1)$ | $m(m-1)$ | $j(j+1) - m(m-1)$ | $\sqrt{j(j+1) - m(m-1)}$ |
|-----|-----|----------|----------|-------------------|--------------------------|
| 1   | 1   | 2        | 0        | 2                 | $\sqrt{2}$               |
| 1   | 0   | 2        | 0        | 2                 | $\sqrt{2}$               |
| 1   | -1  | 2        | 2        | 0                 | 0                        |

**Section S3. SPIN (RANK) 3/2**

| $j$           | $m$            | $j(j+1)$       | $m(m-1)$       | $j(j+1) - m(m-1)$ | $\sqrt{j(j+1) - m(m-1)}$ |
|---------------|----------------|----------------|----------------|-------------------|--------------------------|
| $\frac{3}{2}$ | $\frac{3}{2}$  | $\frac{15}{4}$ | $\frac{3}{4}$  | 3                 | $\sqrt{3}$               |
| $\frac{3}{2}$ | $\frac{1}{2}$  | $\frac{15}{4}$ | $-\frac{1}{4}$ | 4                 | 2                        |
| $\frac{3}{2}$ | $-\frac{1}{2}$ | $\frac{15}{4}$ | $\frac{3}{4}$  | 3                 | $\sqrt{3}$               |
| $\frac{3}{2}$ | $-\frac{3}{2}$ | $\frac{15}{4}$ | $\frac{15}{4}$ | 0                 | 0                        |

**Section S4. SPIN (RANK) 2**

| $j$ | $m$ | $j(j+1)$ | $m(m-1)$ | $j(j+1) - m(m-1)$ | $\sqrt{j(j+1) - m(m-1)}$ |
|-----|-----|----------|----------|-------------------|--------------------------|
| 2   | 2   | 6        | 2        | 4                 | 2                        |
| 2   | 1   | 6        | 0        | 6                 | $\sqrt{6}$               |
| 2   | 0   | 6        | 0        | 6                 | $\sqrt{6}$               |
| 2   | -1  | 6        | 2        | 4                 | 2                        |
| 2   | -2  | 6        | 6        | 0                 | 0                        |

**Section S5. SPIN (RANK) 5/2**

| $j$           | $m$            | $j(j+1)$       | $m(m-1)$       | $j(j+1) - m(m-1)$ | $\sqrt{j(j+1) - m(m-1)}$ |
|---------------|----------------|----------------|----------------|-------------------|--------------------------|
| $\frac{5}{2}$ | $\frac{5}{2}$  | $\frac{35}{4}$ | $\frac{15}{4}$ | 5                 | $\sqrt{5}$               |
| $\frac{5}{2}$ | $\frac{3}{2}$  | $\frac{35}{4}$ | $\frac{3}{4}$  | 8                 | $\sqrt{8}$               |
| $\frac{5}{2}$ | $\frac{1}{2}$  | $\frac{35}{4}$ | $-\frac{1}{4}$ | 9                 | 3                        |
| $\frac{5}{2}$ | $-\frac{1}{2}$ | $\frac{35}{4}$ | $\frac{3}{4}$  | 8                 | $\sqrt{8}$               |
| $\frac{5}{2}$ | $-\frac{3}{2}$ | $\frac{35}{4}$ | $\frac{15}{4}$ | 5                 | $\sqrt{5}$               |
| $\frac{5}{2}$ | $-\frac{5}{2}$ | $\frac{35}{4}$ | $\frac{35}{4}$ | 0                 | 0                        |

**Section S6. SPIN (RANK) 3**

| $j$ | $m$ | $j(j+1)$ | $m(m-1)$ | $j(j+1) - m(m-1)$ | $\sqrt{j(j+1) - m(m-1)}$ |
|-----|-----|----------|----------|-------------------|--------------------------|
| 3   | 3   | 12       | 6        | 6                 | $\sqrt{6}$               |
| 3   | 2   | 12       | 2        | 10                | $\sqrt{10}$              |
| 3   | 1   | 12       | 0        | 12                | $\sqrt{12}$              |
| 3   | 0   | 12       | 0        | 12                | $\sqrt{12}$              |
| 3   | -1  | 12       | 2        | 10                | $\sqrt{10}$              |
| 3   | -2  | 12       | 6        | 6                 | $\sqrt{6}$               |
| 3   | -3  | 12       | 12       | 0                 | 0                        |

**Section S7. SPIN (RANK) 7/2**

| $j$           | $m$            | $j(j+1)$       | $m(m-1)$       | $j(j+1) - m(m-1)$ | $\sqrt{j(j+1) - m(m-1)}$ |
|---------------|----------------|----------------|----------------|-------------------|--------------------------|
| $\frac{7}{2}$ | $\frac{7}{2}$  | $\frac{63}{4}$ | $\frac{35}{4}$ | 7                 | $\sqrt{7}$               |
| $\frac{7}{2}$ | $\frac{5}{2}$  | $\frac{63}{4}$ | $\frac{15}{4}$ | 12                | $\sqrt{12}$              |
| $\frac{7}{2}$ | $\frac{3}{2}$  | $\frac{63}{4}$ | $\frac{3}{4}$  | 15                | $\sqrt{15}$              |
| $\frac{7}{2}$ | $\frac{1}{2}$  | $\frac{63}{4}$ | $-\frac{1}{4}$ | 16                | 4                        |
| $\frac{7}{2}$ | $-\frac{1}{2}$ | $\frac{63}{4}$ | $\frac{3}{4}$  | 15                | $\sqrt{15}$              |
| $\frac{7}{2}$ | $-\frac{3}{2}$ | $\frac{63}{4}$ | $\frac{15}{4}$ | 12                | $\sqrt{12}$              |
| $\frac{7}{2}$ | $-\frac{5}{2}$ | $\frac{63}{4}$ | $\frac{35}{4}$ | 7                 | $\sqrt{7}$               |
| $\frac{7}{2}$ | $-\frac{7}{2}$ | $\frac{63}{4}$ | $\frac{63}{4}$ | 0                 | 0                        |

**Section S8. SPIN (RANK) 4**

| $j$ | $m$ | $j(j+1)$ | $m(m-1)$ | $j(j+1) - m(m-1)$ | $\sqrt{j(j+1) - m(m-1)}$ |
|-----|-----|----------|----------|-------------------|--------------------------|
| 4   | 4   | 20       | 12       | 8                 | $\sqrt{8}$               |
| 4   | 3   | 20       | 6        | 14                | $\sqrt{14}$              |
| 4   | 2   | 20       | 2        | 18                | $\sqrt{18}$              |
| 4   | 1   | 20       | 0        | 20                | $\sqrt{20}$              |
| 4   | 0   | 20       | 0        | 20                | $\sqrt{20}$              |
| 4   | -1  | 20       | 2        | 18                | $\sqrt{18}$              |
| 4   | -2  | 20       | 6        | 14                | $\sqrt{14}$              |
| 4   | -3  | 20       | 12       | 8                 | $\sqrt{8}$               |
| 4   | -4  | 20       | 20       | 0                 | 0                        |

**Section S9. JUSTIFICATION OF  $\hat{j}_{-m,m'}(j) = \langle j, m | \hat{j}_-(j) | j, m' \rangle$  AS THE  $m, m'$  MATRIX ELEMENT OF THE OPERATOR  $\hat{j}_-(j)$**

In Equation 12b of the main text, we state that the matrix elements of the lowering operator can be evaluated with the equation  $\hat{j}_{-m,m'}(j) = \langle j, m | \hat{j}_-(j) | j, m' \rangle$ . Here we provide a justification for this in a quantum mechanical context. In the primary example worked through

in the main text, we concerned ourselves with the total spin of a system of two spin-1 particles. The set of  $|j, m\rangle$  states form an orthonormal basis. In the example of a spin-1 particle, this orthonormal basis can be written, without loss of generality, in the manner shown in Equations S1a-S1c:

$$|1, 1\rangle = \begin{pmatrix} 1 \\ 0 \\ 0 \end{pmatrix} \quad (\text{S1a})$$

$$|1, 0\rangle = \begin{pmatrix} 0 \\ 1 \\ 0 \end{pmatrix} \quad (\text{S1b})$$

$$|1, -1\rangle = \begin{pmatrix} 0 \\ 0 \\ 1 \end{pmatrix} \quad (\text{S1c})$$

The bras corresponding to these three kets are shown in Equations S2a-S2c:

$$\langle 1, 1| = (1 \ 0 \ 0) \quad (\text{S2a})$$

$$\langle 1, 0| = (0 \ 1 \ 0) \quad (\text{S2b})$$

$$\langle 1, -1| = (0 \ 0 \ 1) \quad (\text{S2c})$$

The lowering operator can be written as is shown in Equation S3 below:

$$\hat{j}_-(1) = \begin{pmatrix} \hat{j}_{-1,1}(1) & \hat{j}_{-1,0}(1) & \hat{j}_{-1,-1}(1) \\ \hat{j}_{-0,1}(1) & \hat{j}_{-0,0}(1) & \hat{j}_{-0,-1}(1) \\ \hat{j}_{-1,1}(1) & \hat{j}_{-1,0}(1) & \hat{j}_{-1,-1}(1) \end{pmatrix} \quad (\text{S3})$$

Thus, by applying Equation 12b of the main text, we obtain for the 9 matrix elements of  $\hat{j}_-(1)$



For systems of different spins the same concepts presented here apply, demonstrating how Equation 12b of the main text selects the  $m, m'$  matrix element of the operator of interest.
